# Supplementary material for: Estimated Number of Deaths Prevented Through Increased Physical Activity Among US Adults
Source: PubMed Central journal article supplement (PMC8787676; doi:10.1001/jamainternmed.2021.7755), 2022-01-24
Supplement: jamainternmed-e217755-s001.pdf [file jamainternmed-e217755-s001.pdf]

## Supplementary Online Content

Saint-Maurice PF, Graubard BI, Troiano RP, et al. Estimated number of deaths prevented through increased physical activity among US adults. *JAMA Intern Med*. Published online January 24, 2022. doi:10.1001/jamainternmed.2021.7755

### eMethods

This supplementary material has been provided by the authors to give readers additional information about their work.

## 1 eMethods

2

### 3 Accelerometer-based assessment of physical activity

4 Accelerometry counts generated from the devices were classified as moderate-to-vigorous physical  
5 activity by using an established cut-point of 760 counts per minute.<sup>1,2</sup> This cut-point was calibrated to  
6 differentiate light intensity activities from a broader range of moderate-to-vigorous intensity activities,  
7 including both activities of everyday living as for example, household chores, gardening, and slow  
8 walking, and activities that require walking/ambulation including structured exercise routines and  
9 sports.<sup>1,2</sup> This method has been evaluated for validity<sup>2-5</sup> and we have used it in previous activity-  
10 mortality studies in the National Health and Nutrition Examination Survey (NHANES), finding a strong  
11 inverse non-linear association.<sup>6</sup> In this study we summed all recorded minutes/day that were above this  
12 threshold to determine the amount of moderate-to-vigorous intensity physical activity given the  
13 consensus that all minutes of activity are important for health.<sup>7</sup>

14 Of 6,355 adults 40+ years of age invited to wear the monitor, 4,840 agreed and recorded at least one  
15 day of valid accelerometry data and were included in our study (Figure). Participants with valid  
16 accelerometry data have higher prevalence of obesity (BMI  $\geq 30.0$ ), and current alcohol consumption,  
17 but a lower prevalence of heart disease, heart failure, mobility limitations, stroke, and poor health,  
18 when compared to remaining participants who did not wear the device or had invalid data (n=1,515).<sup>8</sup>  
19 As an adjustment for loss of observations from non-response due to missing accelerometry data we re-  
20 post-stratified NHANES sample weights by cross-classification categories of age, sex and race and  
21 ethnicity categories to match to US population totals in these categories at the time of the survey.  
22 Results were essentially unchanged when compared to not re-post-stratifying the sample weights.

23

### 24 Calculation of Population Attributable Fraction (PAF) and annual deaths

25 We first categorized measured moderate-to-vigorous physical activity into 8 exclusive groups, ranging  
26 from low (0-19 min/d) to high activity (140+ min/d). Activity groups were defined to characterize range  
27 and prevalence of activity levels in the population and the known non-linear relation between physical  
28 activity and mortality.<sup>6</sup> We calculated relative risks (hazard ratios) across the eight activity groups (0-19  
29 min/d, reference) adjusting for demographic factors and covariates including age (years), sex, race and  
30 ethnicity (non-Hispanic White, non-Hispanic Black, Mexican American, and other), education level (<  
31 high school, high school diploma, > than high school), measured body mass index (BMI; <25, 25-29.9,  
32  $\geq 30$  kg/m<sup>2</sup>), diet quality (2005 Healthy Eating Index; continuous), alcohol consumption (never, former,  
33 current, unknown), smoking status (never, former, current), self-reported diabetes (yes, no, borderline),  
34 heart disease (yes, no, missing/unknown), heart failure (yes, no, missing/unknown), stroke (yes, no),  
35 cancer (yes, no), chronic bronchitis (never, former, current, missing/unknown), emphysema (yes, no,  
36 missing/unknown), mobility limitation (no limitations, limitations unrelated to mobility, mobility  
37 limitations, missing/unknown), and general health (excellent, very good, good, fair, poor,  
38 missing/unknown). Relative risks were computed using Cox proportional hazard models with follow-up  
39 time defined from baseline through date of death or censoring (12/31/2015), whichever came first.

40 To calculate the PAFs, we set counterfactuals for increased moderate-to-vigorous physical activity by  
 41 adding 10, 20, and 30 minutes/day to the observed amount of activity for each participant. The  
 42 mortality rate is  $I \sum r_i p_i$ , where  $I$  is the population baseline mortality rate,  $r_i$  and  $p_i$  are the relative risks and  
 43 prevalence, respectively, corresponding to each combination,  $i$ , of activity group and other risk-factors  
 44 and covariates. and the sum is over risk-factor/covariate combinations. We calculated  $r_i^*$  as the  
 45 “counterfactual” relative risk in which the activity level is set to the increased amount, among  
 46 individuals who were not frail and didn’t need special equipment to walk, while keeping all other factors  
 47 for each participant unchanged. The number of deaths/year that could be prevented with increased  
 48 physical activity were calculated as the adjusted PAF<sup>9</sup> x US population annual number of deaths for 2003  
 49 among adults aged 40-84 years (n=1,611,227 deaths).<sup>10</sup>

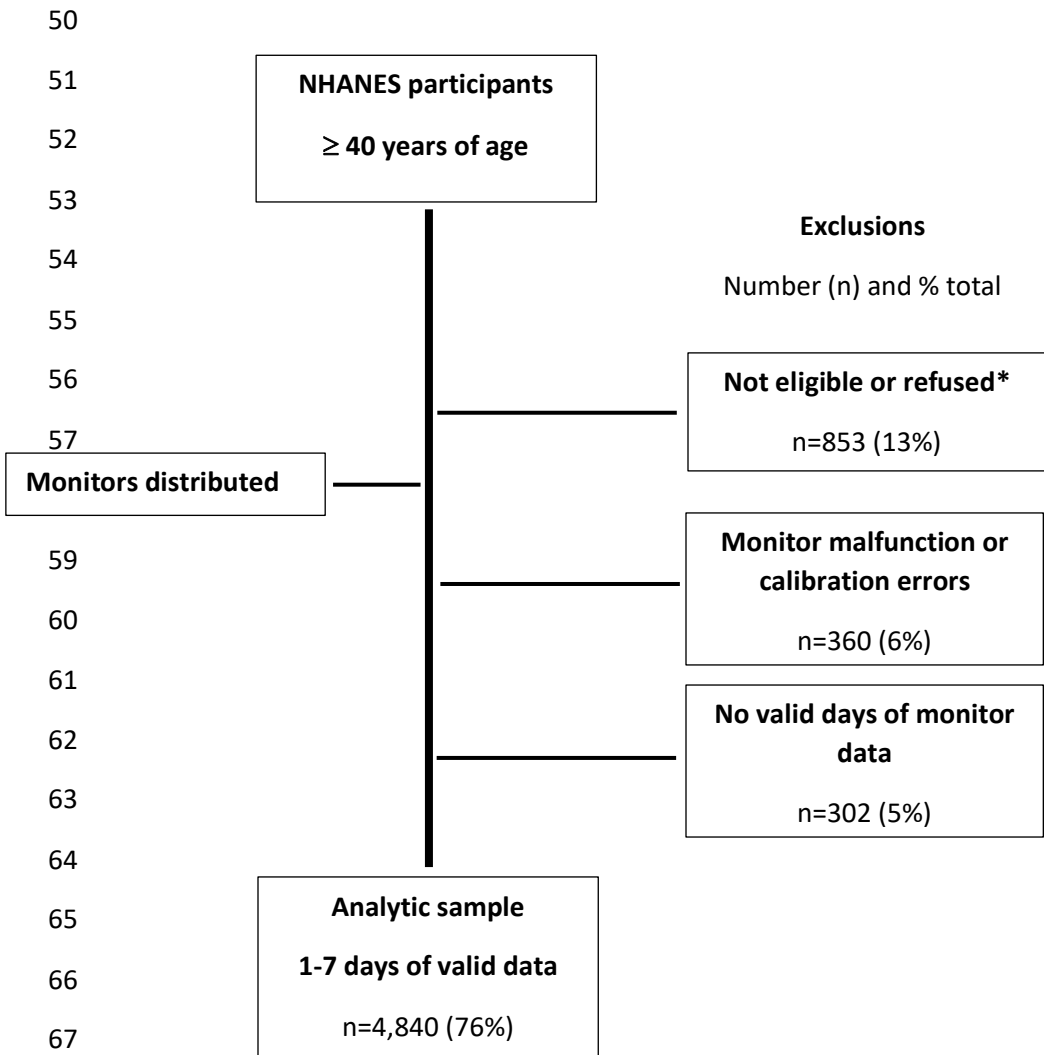

68 \* Participants who were in wheelchairs or who had impairments that  
 69 precluded them from wearing the monitors were not eligible. NHANES  
 70 documentation does distinguish non-eligibility from refusals.

71 **Figure. Flowchart for analytical sample with monitor data.**

72 **References**

73

74 1. Matthews CE. Calibration of accelerometer output for adults. *Med Sci Sports Exerc.* 2005;37(11  
75 Suppl):S512-522.

76 2. Matthews CE, Keadle SK, Berrigan D, et al. Influence of Accelerometer Calibration Approach on  
77 Moderate-Vigorous Physical Activity Estimates for Adults. *Med Sci Sports Exerc.*  
78 2018;50(11):2285-2291.

79 3. Crouter SE, DellaValle DM, Haas JD, Frongillo EA, Bassett DR. Validity of ActiGraph 2-regression  
80 model, Matthews cut-points, and NHANES cut-points for assessing free-living physical activity. *J*  
81 *Phys Act Health.* 2013;10(4):504-514.

82 4. Matthews CE, Kozey Keadle S, Moore SC, et al. Measurement of Active and Sedentary Behavior  
83 in Context of Large Epidemiologic Studies. *Med Sci Sports Exerc.* 2018;50(2):266-276.

84 5. Welk GJ, McClain JJ, Eisenmann JC, Wickel EE. Field validation of the MTI Actigraph and  
85 BodyMedia armband monitor using the IDEEA monitor. *Obesity (Silver Spring, Md).*  
86 2007;15(4):918-928.

87 6. Matthews CE, Keadle SK, Troiano RP, et al. Accelerometer-measured dose-response for physical  
88 activity, sedentary time, and mortality in US adults. *Am J Clin Nutr.* 2016;104(5):1424-1432.

89 7. Piercy KL, Troiano RP, Ballard RM, et al. The Physical Activity Guidelines for Americans. *JAMA.*  
90 2018;320(19):2020-2028.

91 8. Saint-Maurice PF, Troiano RP, Bassett DR, Jr., et al. Association of Daily Step Count and Step  
92 Intensity With Mortality Among US Adults. *JAMA.* 2020;323(12):1151-1160.

93 9. Graubard BI, Flegal KM, Williamson DF, Gail MH. Estimation of attributable number of deaths  
94 and standard errors from simple and complex sampled cohorts. *Stat Med.* 2007;26(13):2639-  
95 2649.

96 10. Hoyert DL, Heron MP, Murphy SL, Kung HC. Deaths: final data for 2003. *Natl Vital Stat Rep.*  
97 2006;54(13):1-120.

98
